# Supplementary material for: Robotic versus Laparoscopic Gastrectomy for Gastric Cancer: An Updated Systematic Review
Source: MDPI journal article supplement (doi:10.3390/medicina58060834), 2022-06-20
Supplement: s1 [file s1]

## Supplementary material – Other outcome parameters of interest

RG = Robotic gastrectomy; LG = Laparoscopic gastrectomy

**Tables S1.** Conversion to open surgery.

| Authors/Year             | No. of studies | Sample size |      | Heterogeneity      |         | Overall effect size | 95% CI of overall effect | P value |
|--------------------------|----------------|-------------|------|--------------------|---------|---------------------|--------------------------|---------|
|                          |                | RG          | LG   | I <sup>2</sup> (%) | P value |                     |                          |         |
| Guerrini et al/2020 [15] | 28             | 3777        | 9584 | 1                  | 0.43    | OR = 0.76           | 0.45 ~ 1.28              | 0.30    |
| Jin et al/2021 [16]      | 7              | /           | /    | 0                  | 0.65    | OR = 0.86           | 0.44 ~ 1.66              | 0.65    |
| Feng et al/2021 [19]     | 4              | 2301        | 2567 | 0                  | 0.62    | OR = 0.62           | 0.40 ~ 1.07              | 0.09    |

**Tables S2.** Proximal margin length.

| Authors/Year             | No. of studies | Sample size |      | Heterogeneity      |         | Overall effect size | 95% CI of overall effect | P value |
|--------------------------|----------------|-------------|------|--------------------|---------|---------------------|--------------------------|---------|
|                          |                | RG          | LG   | I <sup>2</sup> (%) | P value |                     |                          |         |
| Ma et al/2020 [14]       | 7              | 761         | 1252 | 28                 | 0.22    | WMD = 0.10          | - 0.09 ~ 0.29            | 0.30    |
| Guerrini et al/2020 [15] | 13             | 1940        | 4978 | 23                 | 0.21    | WMD = 0.01          | - 0.14 ~ 0.17            | 0.87    |
| Jin et al/2021 [16]      | /              | /           | /    | 0                  | 0.43    | WMD = - 0.005       | - 0.17 ~ - 0.16          | 0.95    |
| Zhang Z et al/2021 [17]  | 5              | 343         | 655  | 66                 | 0.02    | WMD = - 0.24        | - 0.68 ~ 0.19            | 0.27    |
| Feng et al/2021 [19]     | 6              | 1117        | 1319 | 0                  | 0.45    | WMD = - 0.02        | - 0.20 ~ 0.17            | 0.85    |
| Gong et al/2022 [20]     | 6              | 1176        | 1614 | 37                 | 0.18    | WMD = - 0.08        | - 0.42 ~ 0.25            | 0.63    |

**Table S3.** Distal margin length.

| Authors/Year             | No. of studies | Sample size |      | Heterogeneity      |          | Overall effect size | 95% CI of overall effect | P value      |
|--------------------------|----------------|-------------|------|--------------------|----------|---------------------|--------------------------|--------------|
|                          |                | RG          | LG   | I <sup>2</sup> (%) | P value  |                     |                          |              |
| Ma et al/2020 [14]       | 6              | 710         | 1194 | 59                 | 0.03     | WMD = - 0.15        | - 0.52 ~ 0.21            | 0.41         |
| Guerrini et al/2020 [15] | 12             | 1889        | 4920 | 79                 | <0.00001 | WMD = 0.27          | -0.15 ~ 0.69             | 0.21         |
| Jin et al/2021 [16]      | /              | /           | /    | 52                 | 0.078    | WMD = - 0.59        | - 0.98 ~ - 0.20          | <b>0.003</b> |
| Zhang Z et al/2021 [17]  | 5              | 343         | 655  | 0                  | 0.46     | WMD = 0.21          | 0.02 ~ 0.40              | <b>0.03</b>  |
| Feng et al/2021 [19]     | 6              | 1117        | 1319 | 12                 | 0.34     | WMD = 0.22          | - 0.13 ~ 0.27            | 0.51         |
| Gong et al/2022 [20]     | 6              | 1176        | 1614 | 66                 | 0.01     | WMD = - 0.22        | - 0.04 ~ 0.48            | 0.10         |

**Table S4.** Mortality.

| Authors/Year             | No. of studies | Sample size |       | Heterogeneity      |         | Overall effect size | 95% CI of overall effect | P value |
|--------------------------|----------------|-------------|-------|--------------------|---------|---------------------|--------------------------|---------|
|                          |                | RG          | LG    | I <sup>2</sup> (%) | P value |                     |                          |         |
| Ma et al/2020 [14]       | 5              | 762         | 1386  | 0                  | 0.82    | OR = 0.67           | 0.24 ~ 1.90              | 0.45    |
| Guerrini et al/2020 [15] | 30             | 4378        | 10354 | 0                  | 0.95    | OR = 1.43           | 0.77 ~ 2.65              | 0.25    |
| Jin et al/2021 [16]      | 7              | /           | /     | 0                  | 0.93    | OR = 1.28           | 0.51 ~ 3.21              | 0.59    |
| Zhang Z et al/2021 [17]  | 6              | 520         | 1032  | 0                  | 0.92    | OR = 0.69           | 0.37 ~ 1.27              | 0.23    |
| Zhang X et al/2021 [18]  | 5              | 669         | 858   | 0                  | 0.79    | RR = 1.25           | 0.49 ~ 3.22              | 0.64    |
| Gong et al/2022 [20]     | 7              | 1233        | 1741  | 0                  | 0.61    | OR = 1.60           | 0.60 ~ 4.29              | 0.35    |

**Table S5.** Reoperation rate.

| Authors/Year             | No. of studies | Sample size |      | Heterogeneity      |         | Overall effect size | 95% CI of overall effect | P value |
|--------------------------|----------------|-------------|------|--------------------|---------|---------------------|--------------------------|---------|
|                          |                | RG          | LG   | I <sup>2</sup> (%) | P value |                     |                          |         |
| Guerrini et al/2020 [15] | 15             | 1939        | 4467 | 0                  | 0.60    | OR = 1.01           | 0.60 ~ 1.68              | 0.98    |
| Jin et al/2021 [16]      | 8              | /           | /    | 0                  | 0.92    | OR = 0.85           | 0.48 ~ 1.52              | 0.60    |
| Feng et al/2021 [19]     | 5              | 1197        | 1464 | 0                  | 0.95    | OR = 0.63           | 0.33 ~ 1.20              | 0.16    |
| Gong et al/2022 [20]     | 4              | 482         | 788  | 0                  | /       | OR = 0.78           | 0.30 ~ 2.06              | 0.62    |

**Table S6.** Anastomotic leakage.

| Authors/Year             | No. of studies | Sample size |      | Heterogeneity      |         | Overall effect size | 95% CI of overall effect | P value |
|--------------------------|----------------|-------------|------|--------------------|---------|---------------------|--------------------------|---------|
|                          |                | RG          | LG   | I <sup>2</sup> (%) | P value |                     |                          |         |
| Guerrini et al/2020 [15] | 26             | 4045        | 9595 | 0                  | 0.89    | OR = 1.04           | 0.79 ~ 1.37              | 0.78    |
| Jin et al/2021 [16]      | /              | /           | /    | 0                  | 0.93    | OR = 0.88           | 0.60 ~ 1.30              | 0.53    |
| Zhang Z et al/2021 [17]  | 9              | 885         | 1517 | 0                  | 0.92    | OR = 0.84           | 0.45 ~ 1.58              | 0.59    |
| Zhang X et al/2021 [18]  | 7              | 927         | 1100 | 0                  | 0.94    | RR = 0.58           | 0.30 ~ 1.10              | 0.10    |
| Feng et al/2021 [19]     | 14             | 4474        | 4943 | 0                  | 0.67    | OR = 0.93           | 0.67 ~ 1.29              | 0.67    |
| Gong et al/2022 [20]     | 7              | 1073        | 1708 | 0                  | /       | OR = 0.88           | 0.36 ~ 2.15              | 0.78    |

**Table S7.** Delayed gastric emptying.

| Authors/Year            | No. of studies | Sample size |     | Heterogeneity      |         | Overall effect size | 95% CI of overall effect | P value |
|-------------------------|----------------|-------------|-----|--------------------|---------|---------------------|--------------------------|---------|
|                         |                | RG          | LG  | I <sup>2</sup> (%) | P value |                     |                          |         |
| Jin et al/2021 [16]     | /              | /           | /   | 0                  | 0.91    | OR = 1.16           | 0.56 ~ 2.41              | 0.69    |
| Zhang Z et al/2021 [17] | 6              | 447         | 434 | 0                  | 0.90    | OR = 1.44           | 0.62 ~ 3.34              | 0.39    |
| Zhang X et al/2021 [18] | 5              | 590         | 750 | 0                  | 0.87    | RR = 1.14           | 0.47 ~ 2.75              | 0.78    |

**Table S8.** Intestinal obstruction.

| Authors/Year            | No. of studies | Sample size |      | Heterogeneity      |         | Overall effect size | 95% CI of overall effect | P value |
|-------------------------|----------------|-------------|------|--------------------|---------|---------------------|--------------------------|---------|
|                         |                | RG          | LG   | I <sup>2</sup> (%) | P value |                     |                          |         |
| Jin et al/2021 [16]     | /              | /           | /    | 0                  | 0.65    | OR = 1.05           | 0.48 ~ 2.31              | 0.90    |
| Zhang X et al/2021 [18] | 5              | 812         | 947  | 0                  | 0.66    | RR = 0.70           | 0.27 ~ 1.87              | 0.48    |
| Gong et al/2022 [20]    | 6              | 783         | 1046 | 0                  | /       | OR = 0.95           | 0.38 ~ 2.34              | 0.91    |

**Table S9.** Wound infection.

| Authors/Year            | No. of studies | Sample size |      | Heterogeneity      |         | Overall effect size | 95% CI of overall effect | P value |
|-------------------------|----------------|-------------|------|--------------------|---------|---------------------|--------------------------|---------|
|                         |                | RG          | LG   | I <sup>2</sup> (%) | P value |                     |                          |         |
| Jin et al/2021 [16]     | /              | /           | /    | 0                  | 0.84    | OR = 0.94           | 0.62 ~ 1.44              | 0.79    |
| Zhang X et al/2021 [18] | 7              | 927         | 1100 | 0                  | 0.95    | RR = 0.74           | 0.42 ~ 1.30              | 0.29    |

**Table S10.** Intra-abdominal infection.

| Authors/Year            | No. of studies | Sample size |      | Heterogeneity      |         | Overall effect size | 95% CI of overall effect | P value |
|-------------------------|----------------|-------------|------|--------------------|---------|---------------------|--------------------------|---------|
|                         |                | RG          | LG   | I <sup>2</sup> (%) | P value |                     |                          |         |
| Zhang X et al/2021 [18] | 5              | 748         | 876  | 0                  | 0.84    | RR = 0.76           | 0.29 ~ 2.02              | 0.58    |
| Gong et al/2022 [20]    | 6              | 582         | 1305 | 0                  | /       | OR = 0.88           | 0.35 ~ 2.25              | 0.80    |

**Table S11.** Duodenal stump leakage.

| Authors/Year         | No. of studies | Sample size |      | Heterogeneity      |         | Overall effect size | 95% CI of overall effect | P value |
|----------------------|----------------|-------------|------|--------------------|---------|---------------------|--------------------------|---------|
|                      |                | RG          | LG   | I <sup>2</sup> (%) | P value |                     |                          |         |
| Feng et al/2021 [19] | 6              | 3192        | 3458 | 0                  | 0.69    | OR = 0.88           | 0.53 ~ 1.45              | 0.61    |
| Gong et al/2022 [20] | 4              | 940         | 1002 | 0                  | /       | OR = 0.96           | 0.43 ~ 2.11              | 0.91    |

**Table S12.** Anastomotic stenosis.

| Authors/Year         | No. of studies | Sample size |      | Heterogeneity      |         | Overall effect size | 95% CI of overall effect | P value |
|----------------------|----------------|-------------|------|--------------------|---------|---------------------|--------------------------|---------|
|                      |                | RG          | LG   | I <sup>2</sup> (%) | P value |                     |                          |         |
| Feng et al/2021 [19] | 5              | 2630        | 2630 | 0                  | 0.57    | OR = 1.00           | 0.48 ~ 2.08              | 1.00    |

**Table S13.** Abdominal bleeding.

| Authors/Year         | No. of studies | Sample size | Heterogeneity              | Overall effect size | 95% CI of overall effect | P value |
|----------------------|----------------|-------------|----------------------------|---------------------|--------------------------|---------|
| Feng et al/2021 [19] | 12             | RG LG       | I <sup>2</sup> (%) P value | OR = 0.66           | 0.41 ~ 1.07              | 0.09    |
|                      |                | 4001 4470   | 0 0.83                     |                     |                          |         |

**Table S14.** Ileus.

| Authors/Year         | No. of studies | Sample size | Heterogeneity              | Overall effect size | 95% CI of overall effect | P value |
|----------------------|----------------|-------------|----------------------------|---------------------|--------------------------|---------|
| Feng et al/2021 [19] | 12             | RG LG       | I <sup>2</sup> (%) P value | OR = 0.82           | 0.52 ~ 1.28              | 0.38    |
|                      |                | 4424 4893   | 0 0.74                     |                     |                          |         |

**Table S15.** Pneumonia.

| Authors/Year            | No. of studies | Sample size | Heterogeneity              | Overall effect size | 95% CI of overall effect | P value |
|-------------------------|----------------|-------------|----------------------------|---------------------|--------------------------|---------|
| Zhang X et al/2021 [18] | 6              | RG LG       | I <sup>2</sup> (%) P value | RR = 0.84           | 0.41 ~ 1.74              | 0.65    |
|                         |                | 877 1044    | 0 0.87                     |                     |                          |         |

**Table S16.** Overall survival.

| Authors/Year               | No. of studies | Sample size | Heterogeneity              | Overall effect size | 95% CI of overall effect | P value |
|----------------------------|----------------|-------------|----------------------------|---------------------|--------------------------|---------|
|                            |                | RG LG       | I <sup>2</sup> (%) P value |                     |                          |         |
| Ma et al/2020 [14]         | 6              | 890 1498    | 0 0.86                     | HR = 0.95           | 0.76 ~ 1.18              | 0.64    |
| Jin et al/2021 (3 yr) [16] | 5              | / /         | 1 0.40                     | OR = 1.03           | 0.78 ~ 1.35              | 0.83    |
| Jin et al/2021 (5 yr) [16] | 3              | / /         | 68 0.04                    | OR = 0.86           | 0.72 ~ 1.03              | 0.10    |
| Feng et al/2021 [19]       | 7              | 3475 4106   | 0 0.80                     | HR = 0.96           | 0.86 ~ 1.07              | 0.50    |

**Table S17.** Recurrence free-survival.

| Authors/Year         | No. of studies | Sample size | Heterogeneity              | Overall effect size | 95% CI of overall effect | P value |
|----------------------|----------------|-------------|----------------------------|---------------------|--------------------------|---------|
|                      |                | RG LG       | I <sup>2</sup> (%) P value |                     |                          |         |
| Ma et al/2020 [14]   | 3              | 586 586     | 0 0.91                     | HR = 0.91           | 0.69 ~ 1.21              | 0.53    |
| Feng et al/2021 [19] | 5              | 2732 2732   | 0 0.68                     | HR = 0.98           | 0.80 ~ 1.21              | 0.85    |

**Table S18.** Recurrence.

| Authors/Year             | No. of studies | Sample size | Heterogeneity              | Overall effect size | 95% CI of overall effect | P value |
|--------------------------|----------------|-------------|----------------------------|---------------------|--------------------------|---------|
|                          |                | RG LG       | I <sup>2</sup> (%) P value |                     |                          |         |
| Ma et al/2020 [14]       | 5              | 757 1038    | 0 0.62                     | OR = 0.90           | 0.67 ~ 1.21              | 0.50    |
| Guerrini et al/2020 [15] | 10             | 1322 1942   | 0 0.97                     | OR = 0.86           | 0.67 ~ 1.11              | 0.25    |
| Zhang Z et al/2021 [17]  | 3              | 231 222     | 0 0.91                     | OR = 0.69           | 0.39 ~ 1.23              | 0.21    |
